# Supplementary material
Source: PubMed Central journal article supplement (PMC3520621)

## Supplemental Figures

### **Figure S1. Effect of immune-suppressive therapies on B-cell counts in CGD patients.**

CD19<sup>+</sup> B-cell counts are shown for HD and CGD patients. The CGD group was also divided into two subgroups based on immunosuppressive therapies (Table 1): “no/low dose” for those receiving no treatment or <0.1 mg/kg/day prednisone and/or humira; and “high dose” for those receiving >0.1 mg/kg/day prednisone or methotrexate. Horizontal bars represent medians.

### **Figure S2. Lower frequencies of CD27-expressing B cells in CGD patients with the**

**gp91<sup>phox</sup> mutation.** PBMCs of CGD patients were stained with antibodies against CD3, CD10, CD19, CD21 and CD27 for FACS analysis. Gating on CD19<sup>+</sup>/CD3<sup>-</sup> cells established the B-cell population. Shown are (A) resting and (B) activated memory B cells. Horizontal bars represent medians.

### **Figure S3. Normal IgG memory B-cell responses in CGD patients.**

ASC frequencies shown in Figures 5A and 5B are expressed per B-cell. The percentages of B cells in the PBMC cultures after 4 days were evaluated by immunophenotyping. Horizontal bars represent medians.

Figure S1

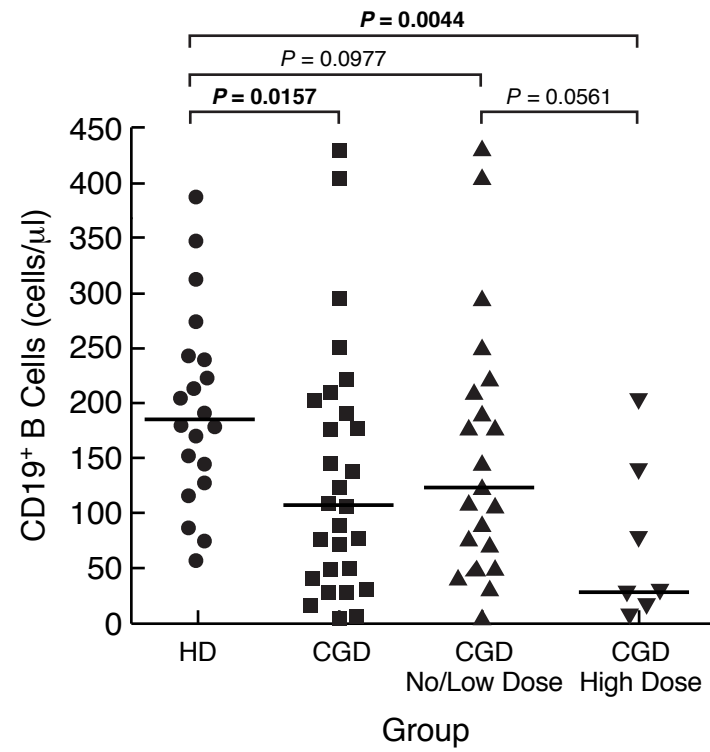

Figure S2

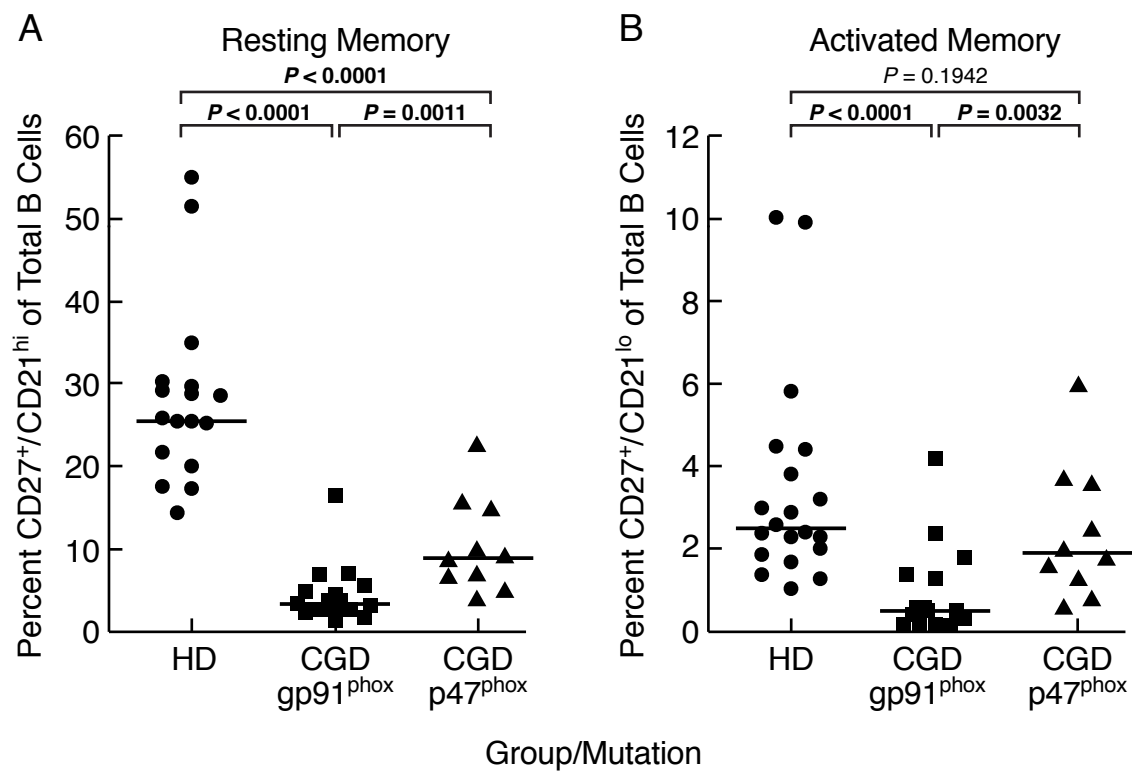

Figure S3

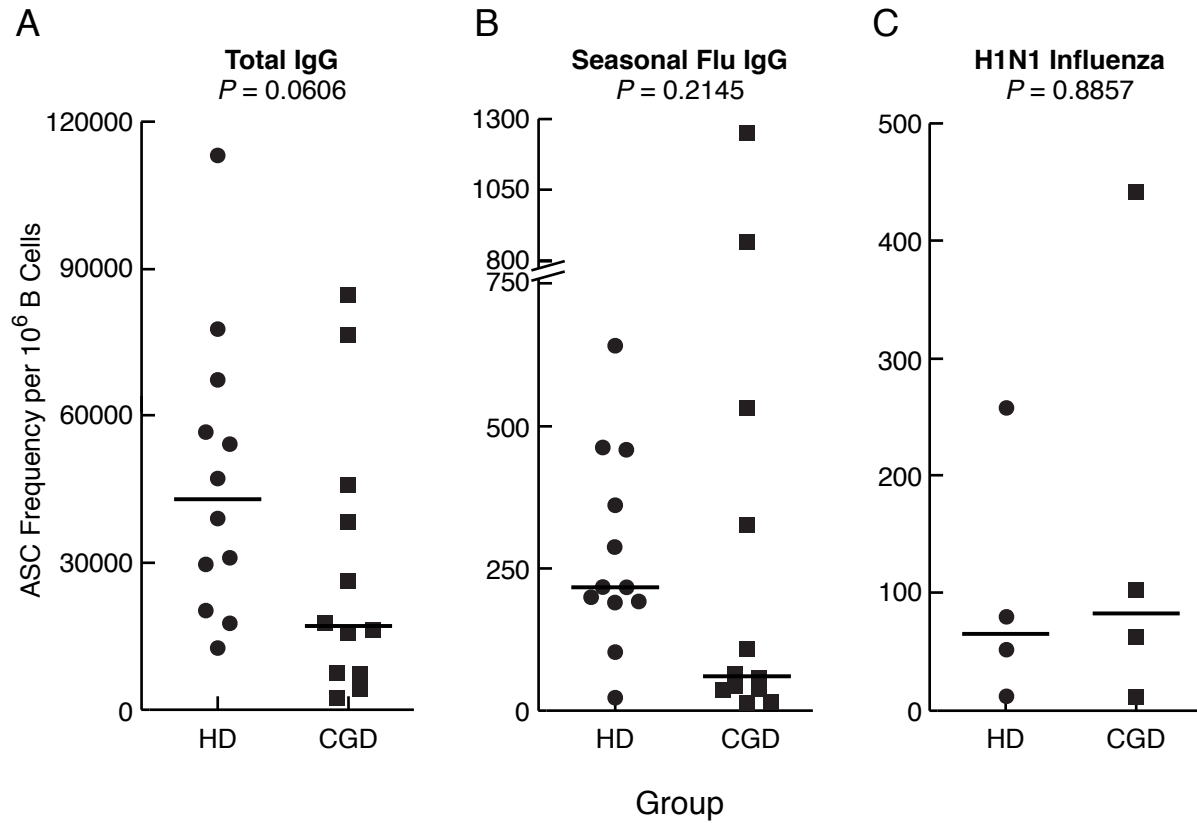

Supplement: supp_blood-2012-05-430959_blood-2012-05-430959-1.pdf [file supp_blood-2012-05-430959_blood-2012-05-430959-1.pdf]
